# Supplementary material
Source: publisher figshare collection journal article supplement (https://plos.figshare.com/articles/dataset/_/11605920)

UNEDITED GEL FOR FIGURE 1

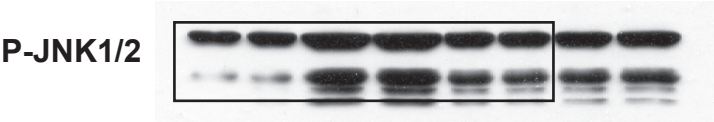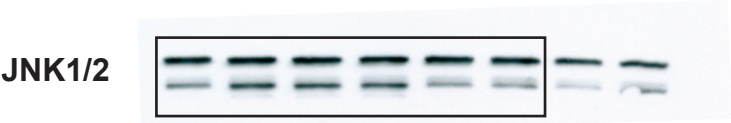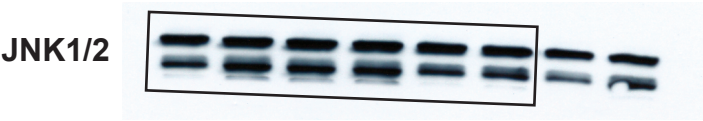

longer exposure

## UNEDITED GELS FOR FIGURE 2

JNK1/2

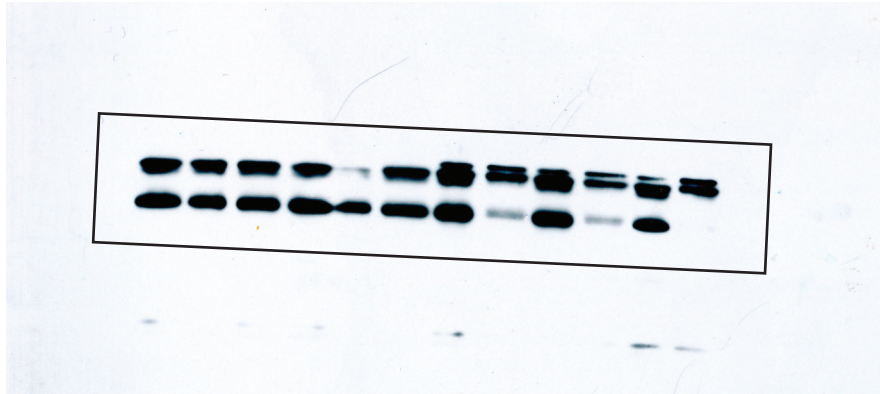

actin

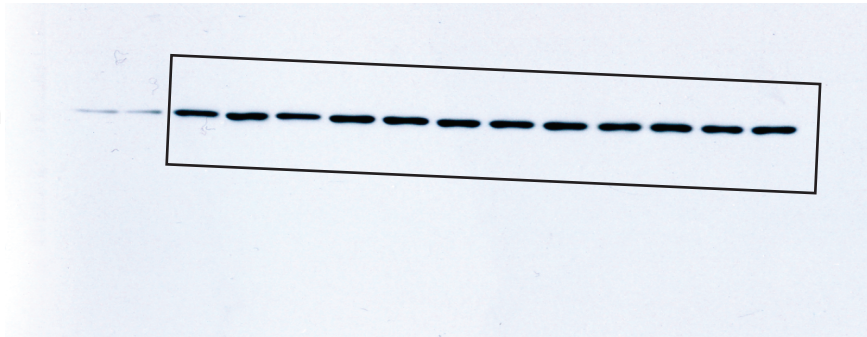

**UNEDITED GEL FOR FIGURE 5**

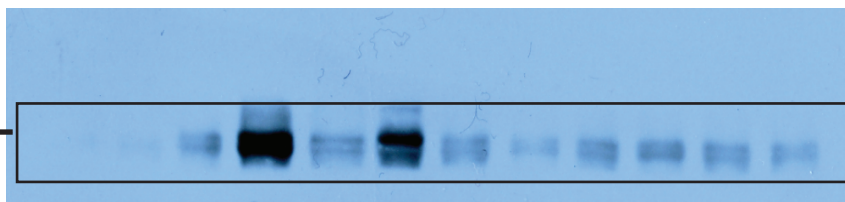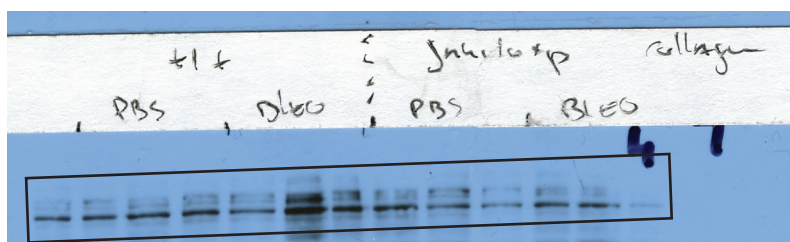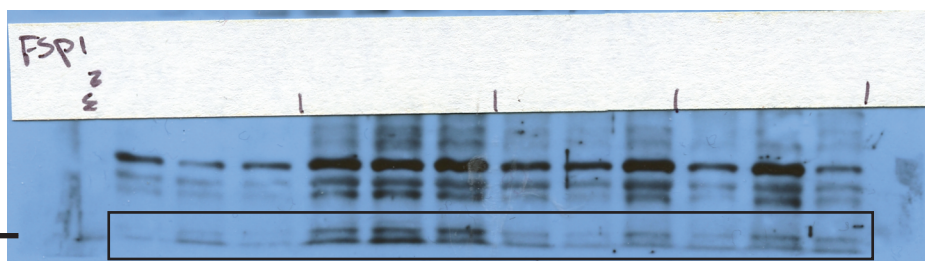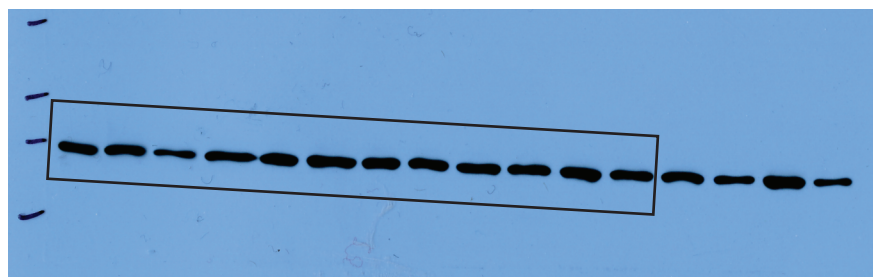

# UNEDITED GELS FOR FIGURE 6

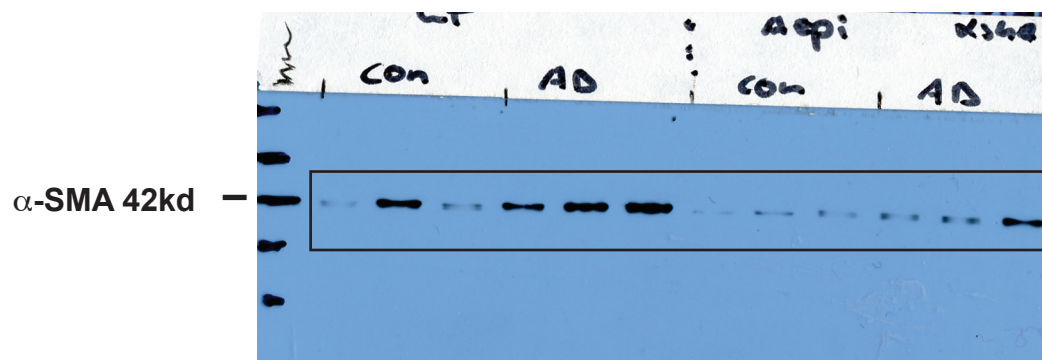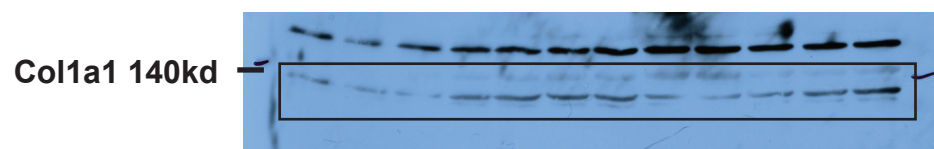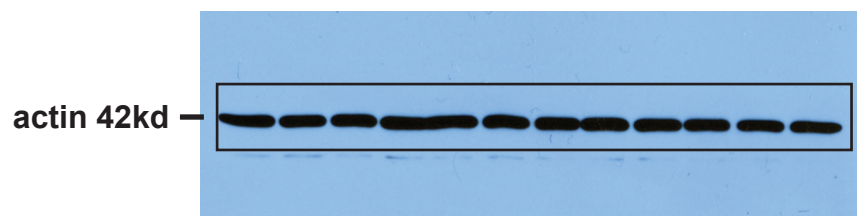

Supplement: Supplementary file [file 1]
